# Supplementary material for: Identification and quantification of microplastics in table sea salts using micro-NIR imaging methods
Source: Royal Society of Chemistry journal article supplement (doi:10.1039/c8ay00125a), 2018-01-01
Supplement: c8ay00125a1.pdf [file c8ay00125a1.pdf]

### ***Identification and quantification of microplastics in table sea salts using micro-NIR imaging methods***

Jixiong Zhang<sup>1</sup>, Kuangda Tian<sup>2</sup>, Chunli Lei<sup>3</sup> and Shungeng Min\*

College of Science, China Agricultural University, 100193, PR China

(\*) Email address: [minsng@263.net](mailto:minsng@263.net)

CONTENTS: Binary images of the microplastic particles in all individual ROIs based on SAM analysis (Figure S1), binary images of the microplastic particles in all individual ROIs based on EDM analysis (Figure S2).

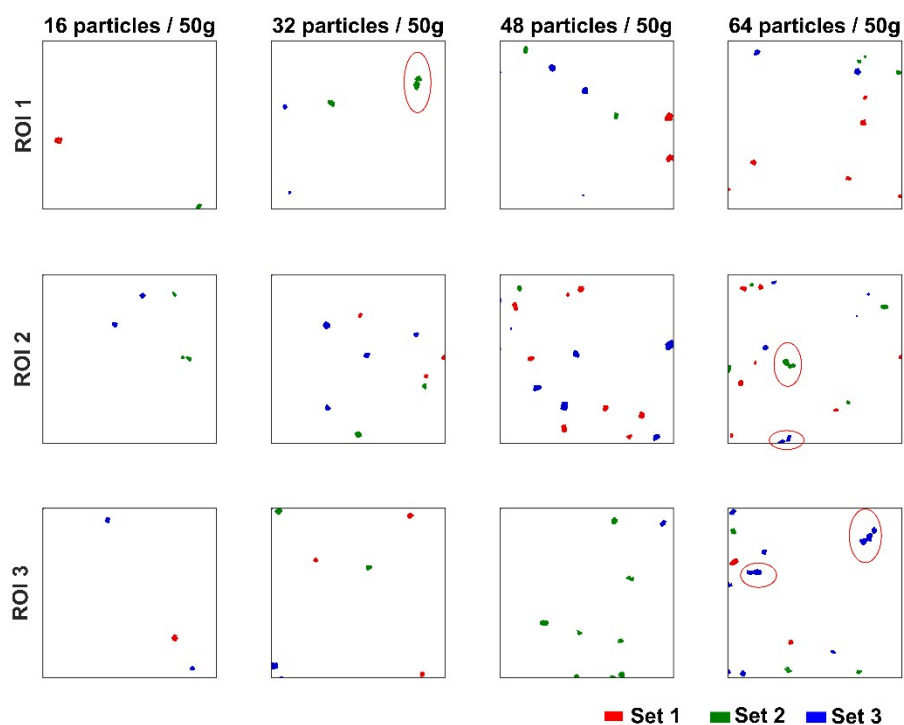

**Figure S1:** Binary images of the microplastic particles in all individual ROIs based on SAM analysis. All three sample replicates (Set 1, Set 2 and Set 3) are shown.

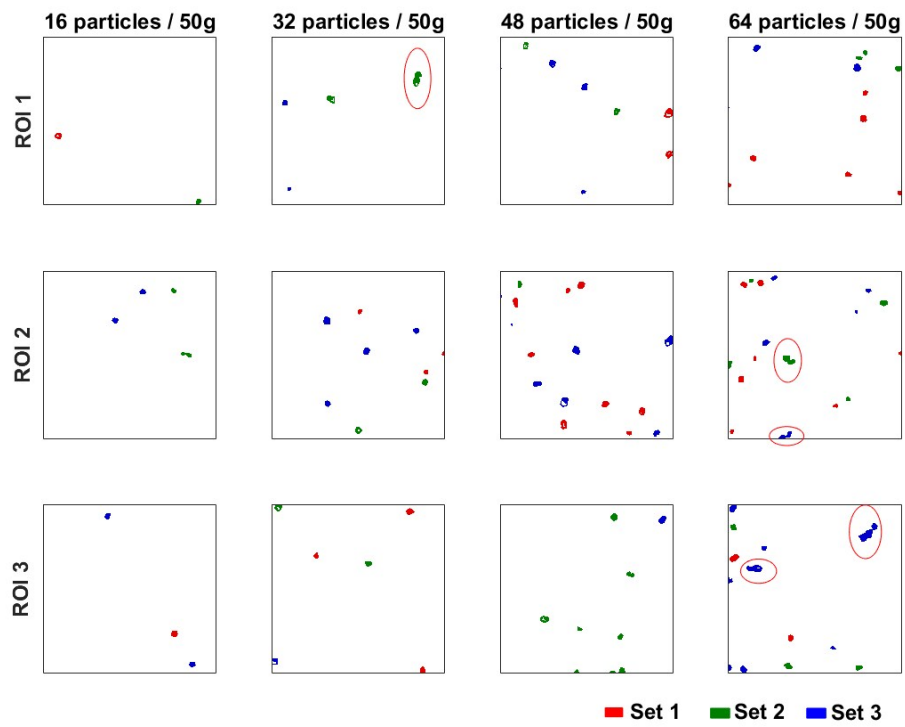

**Figure S2.** Binary images of the microplastic particles in all individual ROIs based on EDM analysis. All three sample replicates (Set 1, Set 2 and Set 3) are shown
